# Supplementary material
Source: MDPI journal article supplement (https://www.mdpi.com/2304-6767/11/11/257)
Supplement: s1 [file s1]

## Supplementary Table S1

| Results of patch test for metal allergy |               |          |
|-----------------------------------------|---------------|----------|
| Metal allergens                         | Concentration | Reaction |
| aluminium chloride                      | 2%            | –        |
| gold(III) chloride                      | 0.2%          | –        |
| tin(III) chloride                       | 1%            | –        |
| iron(III) chloride                      | 2%            | –        |
| hexachloro platinum (IV)                | 0.5%          | –        |
| palladium chloride                      | 1%            | –        |
| indium trichloride                      | 1%            | –        |
| iridium tetrachloride                   | 1%            | –        |
| zinc chloride                           | 2%            | –        |
| manganese(II) chloride                  | 2%            | –        |
| silver bromide                          | 2%            | –        |
| potassium dichromate                    | 0.5%          | –        |
| cobalt(III) chloride                    | 2%            | –        |
| copper(II) sulfate                      | 1%            | –        |
| mercury(II) chloride                    | 0.05%         | –        |
| nickel(II) sulfate                      | 5%            | –        |
| chromium(III) sulfate                   | 2%            | –        |

A patch test was performed with the metal reagent (Torii Pharmaceutical Co., LTD., Tokyo, Japan) using Finn Chamber (Epitest Ltd. Oy, Tuusula Finland) and Scanpor Tape (NORGESPLASTER A/S, OSLO, Norway). A chamber was patched on the patient's back for 48 hours. Results were observed after 48 hours, 72 hours, and 1 week based on the criteria of the International Society for Contact Dermatitis. Fulfilling the International Contact Dermatitis Research Group criteria or higher at 72 hours was regarded as positive.
